# 1 Automatic identification of players in the flavonoid 2 biosynthesis with application on the biomedical plant 3 *Croton tiglium*

4 Boas Pucker<sup>1,2</sup>, Franziska Reiher<sup>1</sup> and Hanna Marie Schilbert<sup>1,\*</sup>

5 <sup>1</sup> Genetics and Genomics of Plants, CeBiTec & Faculty of Biology, Bielefeld University, 33615 Bielefeld, Germany;  
6 bpucker@cebitec.uni-bielefeld.de (B.P.); freiher@cebitec.uni-bielefeld.de (F.R.); hschilbe@cebitec.uni-bielefeld.de  
7 (H.M.S.)

8 <sup>2</sup> Evolution and Diversity, Department of Plant Sciences, University of Cambridge, Cambridge, United Kingdom;  
9 bpucker@cebitec.uni-bielefeld.de (B.P.)

10 \* Correspondence: hschilbe@cebitec.uni-bielefeld.de (H.M.S.)

11

12 **Abstract:** The flavonoid biosynthesis is a well characterised model system for specialised metabolism and  
13 transcriptional regulation in plants. Flavonoids have numerous biological functions like UV protection and  
14 pollinator attraction, but also biotechnological potential. Here, we present Knowledge-based Identification of  
15 Pathway Enzymes (KIPEs) as an automatic approach for the identification of players in the flavonoid  
16 biosynthesis. KIPEs combines comprehensive sequence similarity analyses with the inspection of functionally  
17 relevant amino acid residues and domains in subjected peptide sequences. Comprehensive sequence sets of  
18 flavonoid biosynthesis enzymes and knowledge about functionally relevant amino acids were collected. As a  
19 proof of concept, KIPEs was applied to investigate the flavonoid biosynthesis of the medicinal plant *Croton*  
20 *tiglium* based on a transcriptome assembly. Enzyme candidates for all steps in the biosynthesis network were  
21 identified and matched to previous reports of corresponding metabolites in *Croton* species.

22

23 **Keywords:** anthocyanins, flavonols, proanthocyanidins, general phenylpropanoid pathway, transcriptional  
24 regulation, plant pigments, cross-species transcriptomics, specialized metabolism, functional annotation

25

---

## 26 1. Introduction

27 Flavonoids are a group of specialised plant metabolites comprising more than 9000 identified compounds  
28 [1] with numerous biological functions [2]. Flavonoids are derived from the amino acid phenylalanine in a  
29 branch of the phenylpropanoid pathway namely the flavonoid biosynthesis (Figure 1). Generally, flavonoids  
30 consist of two aromatic C6-rings and one heterocyclic pyran ring [3]. Products of the flavonoid biosynthesis can  
31 be assigned to different subgroups, including chalcones, flavones, flavonols, flavandiols, anthocyanins,  
32 proanthocyanidins (PA), and aurones [4]. These subclasses are characterised by different oxidation states [5]. In  
33 plants, these aglycons are often modified through the addition of various sugars leading to a huge diversity [6].

34

35

36

37

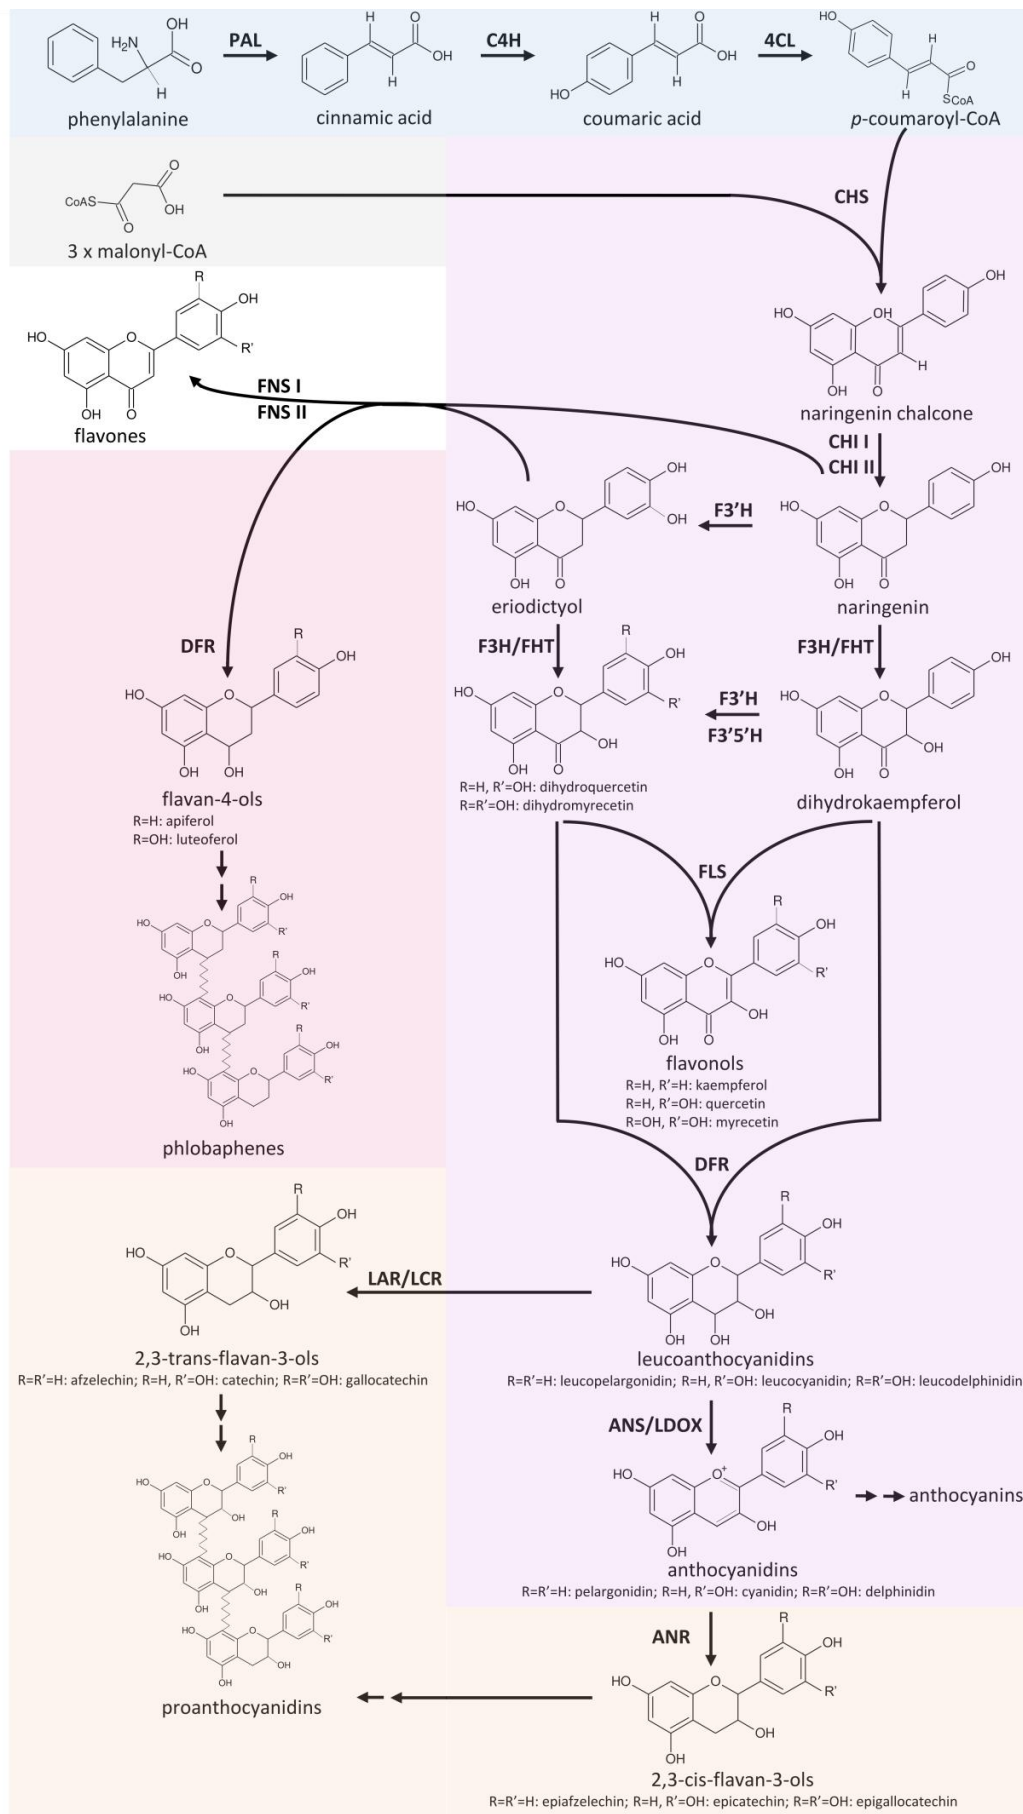

38 **Figure 1:** Simplified illustration of the general phenylpropanoid pathway and the core flavonoid aglycon

39 biosynthesis network.

40 Flavonoids have important developmental and ecological roles in plants including the control of auxin  
41 transport [7], the attraction of pollinators [8], protection of plants against UV light [9], and defense against  
42 pathogens and herbivores [10]. Different types of flavonoids can take up these roles. Anthocyanins appear as  
43 violet, blue, orange, or red pigments in plants recruiting pollinators and seed dispersers [8]. PAs accumulate in  
44 the seed coat leading to the characteristic dark colour of seeds in many species [8]. Flavonols are stored in their  
45 glycosylated form in the vacuole of epidermal cells or on occasion in epicuticular waxes [4]. They possess  
46 several physiological functions including antimicrobial activities, scavenging of reactive oxygen species  
47 (ROS), UV protection, and action as signalling molecules and by providing flower pigmentation together with  
48 anthocyanins [9]. Consequently, the activity of different branches of the flavonoid biosynthesis needs to be  
49 adjusted in response to developmental stages and environmental conditions. While the biosynthesis of  
50 anthocyanins can be triggered by abiotic factors such as light, temperature, dryness or salts [11], PAs are formed  
51 independently of external stimuli in the course of seed development leading to a brown seed colour [11].

52 As the accumulation of flavonoids in fruits and vegetables [12] leads to coloration desired by customers,  
53 this pigment pathways is of biotechnological relevance. Therefore, the flavonoid biosynthesis was previously  
54 modified by genetic engineering in multiple species (as reviewed in [13]). Flavonoids are not just interesting  
55 colorants, but have been reported to have nutritional benefits [14] and even potential in medical applications  
56 [15]. Reported anti-oxidative, anti-inflammatory, anti-mutagenic and anti-carcinogenic properties of flavonoids  
57 may lead to health benefits for humans [16]. For example, kaempferols are assumed to inhibit cancer cell  
58 growth and induce cancer cell apoptosis [17]. Heterologous production of flavonoids in plants is considered a  
59 promising option to meet customers' demands. Studies already demonstrated that the production of  
60 anthocyanins in plant cell cultures is possible [18,19].

61 The flavonoid biosynthesis is one of the best-studied pathways in plants thus serving as a model system for  
62 the investigation of secondary metabolism [9]. Academic interest in the synthesis of flavonoids spans multiple  
63 fields including molecular genetics, chemical ecology, biochemistry, and health sciences [9,20]. Especially the  
64 three subgroups flavonols, anthocyanins, and PAs are well studied in the model organism *Arabidopsis thaliana*  
65 [21]. Since a partial lack of flavonoids is not lethal under most conditions, there are large numbers mutants with  
66 visible phenotypes caused by the knockout of various genes in the pathway [22]. For example, seeds lacking  
67 PAs show a yellow phenotype due to the absence of brown pigments in the seed coat which inspired the name of  
68 mutants in this pathway: *transparent testa* [23]. While the early steps of the flavonoid aglycon biosynthesis are  
69 very well known, some later steps require further investigation. Especially the transfer of sugars to PAs and  
70 anthocyanidins offer potential for future discoveries [24].

71  
72 The core pathway of the flavonoid aglycon biosynthesis comprises several key steps which allow effective  
73 channeling of substrates in specific branches (Figure 1). A polyketid III enzyme, the chalcone synthase (CHS),  
74 catalyses the initial step of the flavonoid biosynthesis which is the conversion of *p*-coumaroyl-CoA and three  
75 malonyl-CoA into naringenin chalcone [25]. Since a knock-out or down-regulation of this step influences all  
76 branches of the flavonoid biosynthesis, CHS is well studied in a broad range of species. Flower colour  
77 engineering with CHS resulted in the identification of mechanisms for the suppression of gene expression [26].  
78 *A. thaliana* CHS can be distinguished from very similar stilbene synthases (STS) based on two diagnostic  
79 amino acid residues Q166 and Q167, while a STS would show Q166 H167 or H166 Q167 [27]. The chalcone  
80 isomerase (CHI) catalyses the conversion of bicyclic chalcones into tricyclic (S)-flavanones [28]. CHI I  
81 converts 6'-tetrahydrochalcone to 5-hydroxyflavanone, while CHI II additionally converts 6'-deoxychalcone  
82 to 5-dexoyflavanone [29]. An investigation of CHI in early land plants revealed the presence of CHI II, which is  
83 in contrast to the initial assumption that CHI II activity would be restricted to legumes [30]. A detailed theory  
84 about the evolution of functional CHIs from non-enzymatic fatty acid binding proteins and the origin of  
85 CHI-like proteins was developed based on evolution experiments [31]. The CHI product naringenin can be  
86 processed by different enzymes broadening the flavonoid biosynthesis pathway to a metabolic network.

87 Flavanone 3 $\beta$ -hydroxylase (F3H/FHT) catalyses 3-hydroxylation of naringenin to dihydroflavonols [32].  
88 As a member of the 2-oxoglutarate-dependent oxygenase (2-ODD) family, F3H utilises the same cofactors and  
89 cosubstrate as the two other 2-ODD enzymes in the flavonoid biosynthesis: flavonol synthase (FLS) and  
90 leucoanthocyanidin oxygenase (LDOX) / anthocyanidin synthase (ANS) [33]. The 2-ODD enzymes share

91 overlapping substrate and product selectivities [34]. FLS was identified to be a bifunctional enzyme showing  
92 F3H activity in some species including *A. thaliana* [35], *Oryza sativa* [36], and *Ginkgo biloba* [37]. ANS, an  
93 enzyme of a late step in the flavonoid biosynthesis pathway, can have both, FLS and F3H activity [38–41]. Due  
94 to its FLS side-activity, ANS has to be considered as additional candidate for the synthesis of flavonols. The  
95 flavonoid 3' hydroxylase (F3'H) catalyses the conversion of naringenin to eriodictyol and the conversion of  
96 dihydrokaempferol to dihydroquercetin [42]. Expression and activity of flavonoid 3'5' hydroxylase (F3'5'H) is  
97 essential for the formation of 5'-hydroxylated anthocyanins which cause the blue colour of flowers [13,43].  
98 F3'5'H competes with FLS for dihydroflavonols thus it is possible that F3'5'H processes only the excess of  
99 these substrates that surpass the FLS capacity [44]. Functionality of enzymes like F3'5'H or F3'H is determined  
100 by only a few amino acids. A T487S mutation converted a *Gerbera hybrida* F3'H into a F3'5'H and the reverse  
101 mutation in an *Osteospermum hybrida* F3'5'H deleted the F3'5'H activity almost completely while F3'H  
102 activity remained [45]. The central enzyme in the flavonol biosynthesis is FLS, which converts a  
103 dihydroflavonol into the corresponding flavonol by introducing a double bond between C-2 and C-3 of the  
104 heterocyclic pyran ring (Figure 1)[46,47]. FLS activity was first identified in irradiated parsley cells [48] and has  
105 from now then been characterised in several species including *Petunia hybrida* [46], *A. thaliana* [49], and *Zea*  
106 *mays* [24], revealing species-specific substrate specificities and affinities.

107 Another branching pathway channels naringenin into the flavone synthesis. Together with flavonols,  
108 flavones occur as primary pigments in white flowers and function as co-pigments with anthocyanins in blue  
109 flowers [50]. Flavanones can be oxidized to flavones by flavanone synthase I (FNS I) [51] and FNS II [52].  
110 Hence, FNS I and FNS II compete with F3H for flavanones and present a branching reaction in the flavonoid  
111 biosynthesis [53]. Being a 2-ODD, FNS I shows only minor differences in its catalytic mechanism compared to  
112 F3H, which are determined by only seven amino acid residues [53]. The exchange of all seven residues in  
113 parsley F3H resulted in a complete change to FNS I activity [53].  
114

115 Colourful pigments are generated in the anthocyanin and proanthocyanidin biosynthesis. The  
116 NADPH-dependent reduction of dihydroflavonols to leucoanthocyanidins by dihydroflavonol-4-reductase  
117 (DFR) is the first committed step of the anthocyanin and proanthocyanidin biosynthesis. There is a competition  
118 between FLS and DFR for dihydroflavonols [54]. DFR enzymes have different preferences for various  
119 dihydroflavonols (dihydrokaempferol, dihydroquercetin, and dihydromyricetin). The molecular basis of these  
120 preferences are probably due to differences in a 26-amino acid substrate binding domain of these enzymes [55].  
121 N at position 3 of the substrate determining domain was associated with recognition of all three  
122 dihydroflavonols [55]. D at position 3 prevented the acceptance of dihydrokaempferols [55], while a L or A lead  
123 to a preference for dihydrokaempferol and substantially reduced the processing of dihydromyricetin [55,56].  
124 Although this position is central for the substrate specificity, other positions contribute to the substrate  
125 specificity [57]. ANS catalyses the last step in the anthocyanin aglycon biosynthesis, the conversion of  
126 leucoanthocyanidins into anthocyanidins. The NADPH/NADH-dependent isoflavone-like reductases,  
127 leucoanthocyanidin reductase (LAR) / leucocyanidin reductase (LCR) and anthocyanidin reductase (ANR,  
128 encoded by *BANYULS* (*BAN*)), are members of the reductase epimerase dehydrogenase superfamily [58]. LAR  
129 channels leucoanthocyanidins into the proanthocyanidin biosynthesis which is in competition with the  
130 anthocyanidin formation catalysed by ANS. There is also a competition between 3-glucosyltransferases (3GT)  
131 and ANR for anthocyanidins [59]. While 3GT generates stable anthocyanins through the addition of a sugar  
132 group to anthocyanidins, ANR channels anthocyanidins into the proanthocyanidin biosynthesis.  
133 Anthocyanidins are instable in aqueous solution and fade rapidly unless the pH is extremely low [60].  
134 Suppression of *ANR1* and *ANR2* in *Glycine max* caused the formation of red seeds through a reduction in  
135 proanthocyanidin biosynthesis and an increased anthocyanin biosynthesis [61]. Substrate preferences of ANR  
136 can differ between species as demonstrated for *A. thaliana* and *M. truncatula* [62].  
137

138 As a complex metabolic network with many branches, the flavonoid biosynthesis requires sophisticated  
139 regulation. Activity of different branches is mainly regulated at the transcriptional level [63]. In *A. thaliana* as in  
140 many other plants, R2R3-MYBs [64,65] and basic helix-loop-helix proteins (bHLH) [66] are two main  
141 transcription factor families involved in the regulation of the flavonoid biosynthesis. The WD40 protein TTG1  
142 facilitates the interaction of R2R3-MYBs and bHLHs in the regulation of the anthocyanin and proanthocyanidin  
143 biosynthesis in *A. thaliana* [67]. Due to its components, this trimeric complex is also referred to as MBW  
144 complex [67]. Examples of MBW complexes are MYB123 / bHLH42 / TTG1 and MYB75 / bHLH2 / TTG1,  
145 which are involved in anthocyanin biosynthesis regulation in a tissue-specific manner [68]. However, the

146 bHLH-independent R2R3-MYBs like MYB12, MYB11, and MYB111 can activate as single transcriptional  
147 activators early genes of the flavonoid biosynthesis including *CHS*, *CHI*, *F3H*, and *FLS* [69].  
148

149 Many previous studies performed a systematic investigation of the flavonoid biosynthesis in plant species  
150 including *Fragaria x ananassa* [70], *Musa acuminata* [71], *Tricyrtis* spp. [72], and multiple *Brassica* species  
151 [73]. In addition to these systematic investigations, genes of the flavonoid biosynthesis are often detected as  
152 differentially expressed in transcriptomic studies without particular focus on this pathway [74–76]. In depth  
153 investigation of the flavonoid biosynthesis starts with the identification of candidate genes for all steps. This  
154 identification of candidates is often relying on an existing annotation or requires tedious manual inspection of  
155 sequence alignments. As plant genome sequences and their structural annotations become available with an  
156 increasing pace [77], the timely addition of functional annotations is an ever increasing challenge. Therefore,  
157 we developed a pipeline for the automatic identification of flavonoid biosynthesis players in any given set of  
158 peptide, transcript, or genomic sequences. As a proof of concept, we validate the predictions made by KIPes  
159 with a manual annotation of the flavonoid biosynthesis in the medicinal plant *Croton tiglium*. *C. tiglium* is a  
160 member of the family Euphorbiaceae [78] and was first mentioned over 2,200 years ago in China as a medicinal  
161 plant probably because of the huge variety of specialised metabolites [79]. Oil of *C. tiglium* was traditionally  
162 used to treat gastrointestinal disorders and may have abortifacient and counterirritant effects [80]. Additionally,  
163 *C. tiglium* produces phorbol esters and a ribonucleoside analog of guanosine with antitumor activity [81,82].  
164 Characterization of the specialised metabolism of *C. tiglium* will facilitate the unlocking of its potential in  
165 agronomical, biotechnological, and medical applications. The flavonoid biosynthesis of *C. tiglium* is largely  
166 unexplored. To the best of our knowledge, previous studies only showed the presence of flavonoids through  
167 analysis of extracts [83–85]. However, transcriptomic resources are available [86] and provide the basis for a  
168 systematic investigation of the flavonoid biosynthesis in *C. tiglium*.  
169

170 A huge number of publicly available genome and transcriptome assemblies of numerous plant species  
171 provide a valuable resource for comparative analysis of the flavonoid biosynthesis. Here, we present an  
172 automatic workflow for the identification of flavonoid biosynthesis genes applicable to any plant species and  
173 demonstrate the functionality by analyzing a *de novo* transcriptome assembly of *C. tiglium*.  
174

## 175 2. Results

176 We developed a tool for the automatic identification of enzyme sequences in a set of peptide sequences, a  
177 transcriptome assembly, or a genome sequence. Knowledge-based Identification of Pathway Enzymes (KIPes)  
178 identifies candidate sequences based on overall sequence similarity, functionally relevant amino acid residues,  
179 and functionally relevant domains (Figure 2). As a proof of concept, the transcriptome assembly of *Croton*  
180 *tiglium* was screened with KIPes to identify the flavonoid aglycon biosynthesis network. Results of the  
181 automatic annotation are validated by a manually curated annotation.  
182

### 183 2.1. Concept and components of Knowledge-based Identification of Pathway Enzymes (KIPes)

#### 184 2.1.1. General concept

185 The automatic detection of sequences encoding enzymes of the flavonoid biosynthesis network requires  
186 (1) a set of bait sequences covering a broad taxonomic range and (2) information about functionally relevant  
187 amino acid residues and domains. Bait sequences were selected to encode enzymes with evidence of  
188 functionality i.e. mutant complementation studies or *in vitro* assays. Additional bait sequences were included  
189 which were previously studied in comparative analyses of the particular enzyme family. Positions of amino  
190 acids and domains with functional relevance need to refer to a reference sequence included in the bait sequence  
191 set. All bait sequences and one reference sequence related to one step in the pathway are supplied in one FASTA  
192 file. However, many FASTA files can be provided to cover all reactions of a complete metabolic network.  
193 Positions of functionally relevant residues and domains are specified in an additional text file based on the  
194 reference sequence (see manual for details, <https://github.com/bpucker/KIPes>). Collections of bait sequences  
195 and detailed information about the relevant amino acid residues in flavonoid biosynthesis enzymes are provided



196 along with KIPes. However, these collections can be customized by users to reflect updated knowledge and  
197 specific research questions. KIPes was developed to have a minimal amount of dependencies. Only the  
198 frequently used alignment tools BLAST and MAFFT are required. Both tools are freely available as  
199 precompiled binaries without the need for installation.

200

#### 201 2.1.2. Three modes

202 A user can choose between three different analysis modes depending on the available input sequences:  
203 peptide sequences, transcript sequences, or a genome sequence. If a reliable peptide sequence annotation is  
204 available, these peptide sequences should be subjected to the analysis. Costs in terms of time and computational  
205 efforts are substantially lower for the analysis of peptide sequences than for the analysis of genome sequences.  
206 The provided peptide sequences are screened via blastp for similarity to previously characterised bait  
207 sequences. Lenient filter criteria are applied to collect a comprehensive set of candidate sequences which is  
208 subsequently refined through the construction of global alignments via MAFFT. Next, phylogenetic trees are  
209 generated to identify best candidates based on their position in a tree. Candidates are classified based on the  
210 closest distance to a bait sequence. Multiple closely related bait sequences can be considered if specified. When  
211 transcript sequences are supplied to KIPes, *in silico* translation in all six possible frames generates a set of  
212 peptide sequences which are subsequently analysed as described above. Supplied DNA sequences are screened  
213 for similarity to the bait peptide sequences via tblastn. Hits reported by tblastn are considered exons or exon  
214 fragments and therefore assigned to groups which might represent candidate genes. The connection of these hits  
215 is attempted in a way that canonical GT-AG splice site combinations emerge. One isoform per locus is  
216 constructed and subsequently analysed as described above.

217

#### 218 2.1.3. Final filtering

219 After identification of initial candidates through overall sequence similarity, a detailed comparison against  
220 a well characterised reference sequence with described functionally relevant amino acid residues is performed.  
221 All candidates are screened for matching amino acid residues at functionally relevant positions. Sequences  
222 encoding functional enzymes are expected to display a matching amino acid residue at all checked positions.  
223 Additionally, the conservation of relevant domains is analysed. A prediction about the  
224 functionality/non-functionality of the encoded enzyme of all candidate sequences is performed at this step.  
225 Results of intermediate steps are stored to allow in depth inspection if necessary.

226

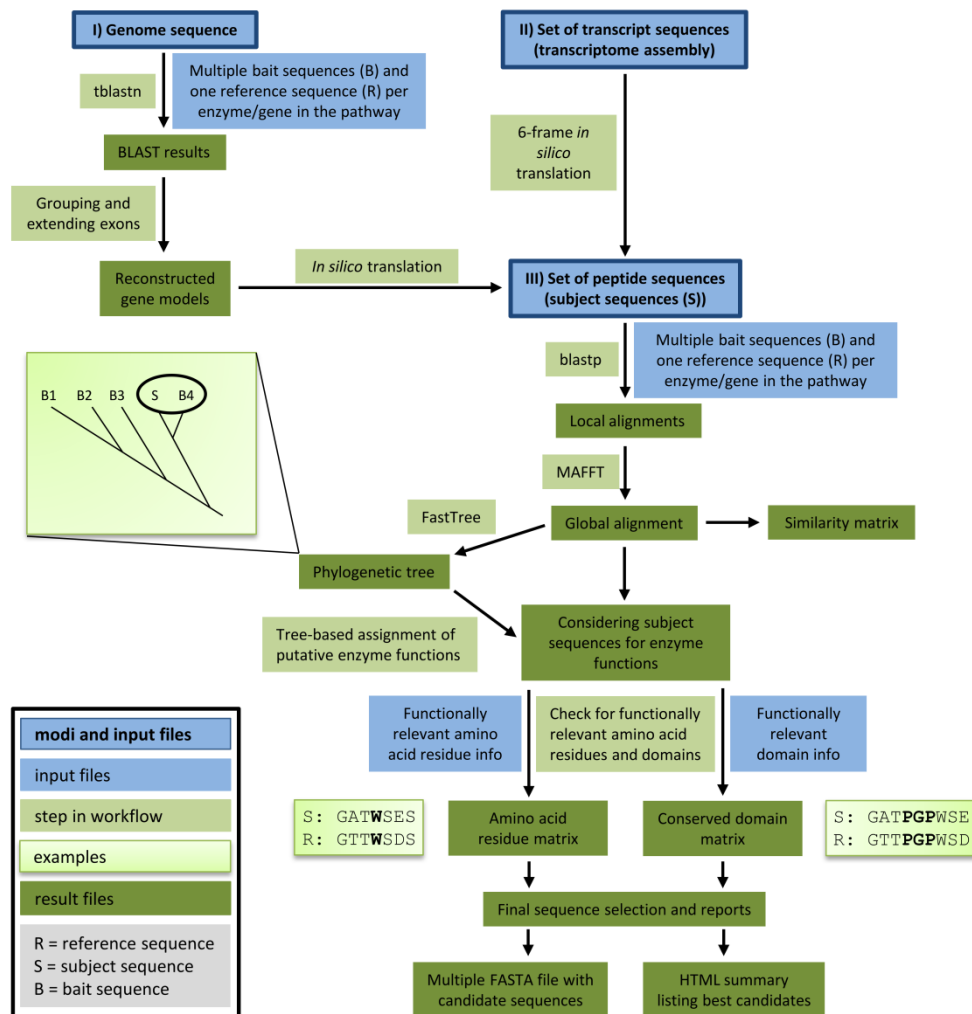

227

228

229

230

231

232

233

## 234 2.2. Technical validation of KIPeS

235

236

237

238

239

240

241

A first technical validation of KIPeS was performed based on sequence data sets of plant species with previously characterized flavonoid biosyntheses namely *A. lyrata*, *A. thaliana*, *Cicer arietinum*, *Fragaria vesca*, *Glycine max*, *Malus domestica*, *M. truncatula*, *Musa acuminata*, *Populus trichocarpa*, *Solanum lycopersicum*, *Solanum tuberosum*, *Theobroma cacao*, and *Vitis vinifera*. The flavonoid biosynthesis of these species was previously characterised thus providing an opportunity for validation. KIPeS identified candidate sequences with conservation of all functionally relevant amino acid residues for the expected enzymes in all species (File S1).

242

## 243 2.3. The flavonoid biosynthesis in *Croton tiglium*

244

245

246

247

Genes in the flavonoid biosynthesis of *C. tiglium* were identified based on bait sequences from over 200 plant species and well characterised reference sequences of *A. thaliana*, *Glycine max*, *Medicago sativa*, *Osteospermum spec.*, *Petroselinum crispum*, *Populus tomentosa*, and *Vitis vinifera*. The transcriptome assembly of *C. tiglium* revealed sequences encoding enzymes for all steps in the flavonoid biosynthesis (Table

248 1). Phylogenetic analyses placed the *C. tiglium* sequences of enzymes in the flavonoid biosynthesis close to the  
249 corresponding sequences of related *Malpighiales* species like *Populus tomentosa* (File S2). Conservation of  
250 previously described amino acid residues was inspected in an alignment with sequences of characterised  
251 enzymes of the respective step (File S3).

252 The general phenylpropanoid biosynthesis is represented by ten phenylalanine ammonia lyase (PAL)  
253 candidates, two cinnamate 4-hydroxylases (C4H) candidates, and one 4-coumarate-CoA ligase (4CL) candidate  
254 (Table 1, File S4, File S5). Many PAL sequences show a high overall sequence similarity indicating that  
255 multiple alleles or isoforms could contribute to the high number. A phylogenetic analysis supports the  
256 hypothesis that many PAL candidates might be alleles or alternative transcript variants of the same genes (File  
257 S2). Very low transcript abundances indicate that at least three of the PAL candidates can be neglected (Table  
258 1).

259 Although multiple CHS candidates were identified based on overall sequence similarity to the *A. thaliana*  
260 CHS sequence, only CtCHSa showed all functionally relevant amino acid residues (File S3). Five other  
261 candidates were discarded due to the lack of Q166 and Q167, which differentiate CHS from other polyketid  
262 synthases like STS or LAP5. Additionally, a CHS signature sequence at the C-terminal end and the  
263 malonyl-CoA binding motif at position 313 to 329 in the *A. thaliana* sequence are conserved in CtCHSa. A  
264 phylogenetic analysis supported these findings by placing CtCHSa in a clade with *bona fide* chalcone synthases  
265 (File S2). There is only one CHI candidate, CtCHI Ia, which contains all functionally relevant amino acid  
266 residues (File S3). No CHI II candidate was detected. *C. tiglium* has one F3H candidate, one F3'H candidate,  
267 and two F3'5'H candidates. CtF3Ha, CtF3'Ha, CtF3'5'Ha, and CtF3'5'Hb show conservation of the respective  
268 functionally relevant amino acid residues (File S3). CtF3'Ha contains the N-terminal proline rich domain and a  
269 perfectly conserved oxygen binding pocket at position 302 to 307 in the *A. thaliana* reference sequence. Both,  
270 CtF3'5'Ha and CtF3'5'Hb, were also considered as F3'H candidates, but show overall a higher similarity to the  
271 F3'5'H bait sequences than to the F3'H bait sequences. The flavone biosynthesis capacities of *C. tiglium*  
272 remained elusive. No FNS I candidates with conservation of all functionally relevant amino acids were  
273 detected. However, there are four FNS II candidates which show only one substitution of an amino acid residue  
274 in the oxygen binding pocket (T313F). The committed step of the flavonol biosynthesis is represented by  
275 CtFLSa and CtFLS which show all functionally relevant residues (File S3).

276 *C. tiglium* contains excellent candidates for all steps of the anthocyanidin and proanthocyanidin  
277 biosynthesis. CtDFR shows conservation of the functionally relevant amino acid residues (File S3). We  
278 investigated the substrate specificity domain to understand the enzymatic potential of the DFR in *C. tiglium*.  
279 Position 3 of this substrate specificity domain shows a D which is associated with low acceptance of  
280 dihydrokaempferols. CtLAR is the only LAR candidate with conservation of the functionally relevant amino  
281 acid residues (File S3). CtANS is the only ANS candidate with conservation of the functionally relevant amino  
282 acid residues (File S3). There are two ANR candidates in *C. tiglium*. CtANRa and CtANRb show conservation  
283 of all functionally relevant amino acid residues (File S3). CtANRa shows 74% identical amino acid residues  
284 when compared to the reference sequence, which exceeds the 49% of CtANRb substantially.

285 The identification of candidates in a transcriptome assembly already shows transcriptional activity of the  
286 respective gene. To resolve the gene activity in greater detail, we quantified the presence of candidate  
287 transcripts in different tissues of *C. tiglium* and compared it to *C. draco* through cross-species transcriptomics  
288 (File S6). High transcript abundance of almost all flavonoid biosynthesis candidates was observed in seeds,  
289 while only a few candidate transcripts were observed in other investigated tissues (Table 1). Transcripts  
290 involved in the proanthocyanidin biosynthesis show an exceptionally high abundance in seeds of *C. tiglium* and  
291 inflorescence of *C. draco*. Overall, the tissue specific abundance of many transcripts is similar between *C.*  
292 *tiglium* and *C. draco*. LAR and ANR show substantially higher transcript abundances in inflorescences of *C.*  
293 *draco* compared to *C. tiglium*. CHS and ANS show the highest transcript abundance in pink flowers of *C. draco*  
294 (File S6).

295



296 **Table 1.** Candidates in the flavonoid biosynthesis of *Croton tiglium*. ‘TRINITY’ prefix of all sequence names was omitted  
 297 for brevity. Candidates are sorted by their position in the respective pathway and decreasing similarity to bait sequences.

298 Transcripts per million (TPM) values of the candidates in different tissues are shown: leaf (SRR6239848), stem  
 299 (SRR6239849), inflorescence (SRR6239850), root (SRR6239851), and seed (SRR6239852). Displayed values are rounded  
 300 to the closest integer thus extremely low abundances are listed as 0. A full table with all available RNA-Seq samples and  
 301 transcript abundance values for all candidates is available in the supplements (File S6).

| Sequence ID                   | Function  | Leaf | Stem | Inflorescence | Root | Seed |
|-------------------------------|-----------|------|------|---------------|------|------|
| DN23351_c0_g1_i2              | CtPALa    | 18   | 10   | 0             | 1    | 29   |
| DN32981_c5_g1_i1              | CtPALb    | 0    | 0    | 0             | 0    | 0    |
| DN32981_c5_g1_i16             | CtPALc    | 4    | 3    | 0             | 0    | 0    |
| DN32981_c5_g1_i9              | CtPALd    | 0    | 0    | 0             | 0    | 0    |
| DN32981_c5_g1_i17             | CtPALe    | 0    | 25   | 0             | 5    | 10   |
| DN32981_c5_g1_i12             | CtPALf    | 5    | 233  | 0             | 18   | 48   |
| DN32981_c5_g1_i5              | CtPALg    | 0    | 318  | 0             | 3    | 3    |
| DN32981_c5_g1_i13             | CtPALh    | 0    | 3    | 0             | 0    | 0    |
| DN32981_c5_g1_i14             | CtPALi    | 0    | 0    | 0             | 0    | 0    |
| DN23351_c0_g2_i1              | CtPALj    | 18   | 1    | 0             | 9    | 12   |
| DN32464_c6_g3_i2              | CtC4Ha    | 122  | 110  | 2             | 77   | 233  |
| DN15593_c0_g1_i1              | CtC4Hb    | 0    | 0    | 0             | 0    | 3    |
| DN32164_c5_g1_i2              | Ct4CLa    | 46   | 19   | 1             | 2    | 113  |
| DN50385_c0_g1_i1              | CtCHSa    | 3    | 6    | 0             | 1    | 588  |
| DN27125_c0_g1_i1              | CtCHI Ia  | 11   | 2    | 19            | 3    | 88   |
| DN33424_c3_g3_i1              | CtF3Ha    | 4    | 21   | 1             | 2    | 342  |
| DN33407_c7_g7_i2 <sup>1</sup> | CtFNS IIa | 1    | 7    | 0             | 95   | 1    |
| DN33407_c7_g7_i1 <sup>1</sup> | CtFNS IIb | 0    | 3    | 1             | 4    | 2    |
| DN27999_c0_g1_i2 <sup>1</sup> | CtFNS IIc | 0    | 2    | 0             | 75   | 0    |
| DN33407_c7_g6_i4 <sup>1</sup> | CtFNS IId | 0    | 0    | 0             | 22   | 0    |
| DN252_c0_g1_i1                | CtF3'Ha   | 111  | 62   | 0             | 9    | 165  |
| DN32466_c16_g7_i1             | CtF3'5'Ha | 0    | 0    | 0             | 7    | 266  |
| DN32466_c16_g7_i3             | CtF3'5'Hb | 0    | 0    | 0             | 0    | 3    |
| DN25915_c0_g1_i3              | CtFLSa    | 18   | 19   | 0             | 0    | 84   |
| DN25915_c0_g2_i1              | CtFLSb    | 0    | 1    | 0             | 1    | 2    |
| DN27402_c0_g1_i3              | CtDFRa    | 0    | 0    | 0             | 0    | 51   |
| DN32893_c8_g1_i1              | CtANSa    | 0    | 0    | 0             | 0    | 25   |
| DN33042_c3_g1_i3              | CtLARa    | 3    | 2    | 0             | 1    | 101  |
| DN30161_c9_g1_i2              | CtANRa    | 0    | 1    | 0             | 1    | 375  |
| DN30161_c9_g1_i3              | CtANRb    | 0    | 0    | 0             | 0    | 3    |

302  
 303 <sup>1</sup> These sequences might encode non-functional enzymes or enzymes with a different function (see results and discussion for  
 304 details), but represent the best FNS II candidates.

305

306 **3. Discussion**

307 As previous studies of extracts from *Croton tiglium* and various other *Croton* species revealed the  
308 presence of flavonoids [84,85,87–92], steps in the central flavonoid aglycon biosynthesis network should be  
309 represented by at least one functional enzyme. However, this is the first identification of candidates involved in  
310 the biosynthesis. Previous reports about flavonoids align well with our observation (Table 1) that at least one  
311 predicted peptide contains all previously described functionally relevant amino acid residues of the respective  
312 enzyme. The only exception is the flavone synthase step. While FNS I is frequently absent in flavonoid  
313 producing species outside the *Apiaceae*, FNS II is more broadly distributed across plants [53]. *C. tiglium* is not  
314 a member of the *Apiaceae* thus the absence of FNS I and the presence of FNS II candidates are expected.

315 All candidate sequences of presumably functional enzymes belong to actively transcribed genes as  
316 indicated by the presence of these sequences in a transcriptome assembly. Since the flavonoid biosynthesis is  
317 mainly regulated at the transcriptional level [63] and previously reported blocks in the pathway are expected to  
318 be due to transcriptional down-regulation [93,94], we expect most branches of the flavonoid biosynthesis in *C.*  
319 *tiglium* to be functional. No CHI II candidate was detected thus *C. tiglium* probably lacks a 6'-deoxychalcone to  
320 5-dexoyflavanone catalytic activity like most non-leguminous plants [30,95].

321 A domination of proanthocyanidins has been reported for *Croton* species [88]. This high proanthocyanidin  
322 content correlates well with high transcript abundance of proanthocyanidin biosynthesis genes (CtLAR,  
323 CtANR). PAs have been reported to account for up to 90% of the dried weight of red sap of *Croton lechleri* [96].  
324 Expression of CtFLSa in the leaves matches previous reports of flavonol extraction from this tissue type  
325 [90,97]. Interestingly, almost all analysed *Croton* species showed very high amounts of quercetin derivates  
326 compared to kaempferol derivates in their leaf extracts, which significantly correlated with antioxidant potential  
327 [97]. This high quercetin concentration might be due to a high expression level of CtF3'Ha in leaves. Since  
328 F3'H converts dihydrokaempferol (DHK) to dihydroquercetin (DHQ), a high expression might result in high  
329 amounts of DHQ which can be used from FLS to produce quercetin. At the same time, the production of  
330 kaempferols from DHK is reduced.

331 Flavonols have been extracted from several *Croton* species covering several important functions.  
332 Quercetin 3,7-dimethyl ether was extracted from *Croton schiedeanus* and elicits vasorelaxation in isolated aorta  
333 [91]. Casticin a methoxylated flavonol from *Croton betulaster* modulates cerebral cortical progenitors in rats  
334 by directly decreasing neuronal death, and indirectly via astrocytes [98]. Besides the anticancer activity of  
335 flavonol rich extracts from *Croton celtidifolius* in mice [99], flavonols extracted from *Croton menyharthii*  
336 leaves possess antimicrobial activity [100]. Kaempferol 7-O- $\beta$ -D-(6"-O-cumaroyl)-glucopyranoside isolated  
337 from *Croton piauhiensis* leaves enhanced the effect of antibiotics and showed antibacterial activity on its own  
338 [101]. Flavonols extracted from *Croton cajucara* showed anti-inflammatory activities [102].

339 Our investigating of the CtDFR substrate specificity revealed aspartate at the third position of the substrate  
340 specificity domain which was previously reported to reduce the acceptance of dihydrokaempferol [55].  
341 Although the substrate specificity of DFR is not completely resolved, a high DHQ affinity would fit to the high  
342 transcript abundance of CtF3'Fs which encodes the putative DHQ producing enzyme. Further investigations  
343 are needed to reveal how effectively *C. tiglium* produces anthocyanins and proanthocyanidins based on  
344 different dihydroflavonols. As *C. tiglium* is known to produce various proanthocyanidins [83], a functional  
345 biosynthetic network must be present. Phlobatannine have been reported in leaves of *C. tiglium* [83] which  
346 aligns well with our identification of a probably functional CtDFRa.

347 Our automatic approach for the identification of flavonoid biosynthesis genes could be applied to identify  
348 target genes for an experimental validation in a species with a newly sequenced transcriptome or genome. Due  
349 to multiple refinement steps, the predictions of KIPes have a substantially higher fidelity than frequently used  
350 BLAST results. Especially the distinction of different enzymes with very similar sequences (e.g. CHS, STS,  
351 LAP5) was substantially improved by KIPes. Additionally, the automatic identification of flavonoid  
352 biosynthesis enzymes/genes across a large number of plant species facilitates comparative analyses which could  
353 be a valuable addition to functional studies or might even replace some studies. As functionally relevant amino  
354 acid residues are well described for many of the enzymes, an automatic classification of candidate sequences as  
355 functional or non-functional is feasible in many cases. It has not escaped our notice that 'non-functionality' only  
356 holds with respect to the initially expected enzyme function. Sub- and neofunctionalisation, especially  
357 following gene duplications, are likely. Results produced by KIPes could be used to identify species-specific  
358 modifications of the general flavonoid biosynthesis. Bi- or even multifunctionality has been described for some  
359 of the members of the 2-oxoglutarate-dependent oxygenases, (FLS [36,103,104], F3H, FNS I, and ANS  
360 [38–41]). Experimental characterization of these enzymes will still be required to determine the degree of the  
361 possible multifunctionalities in one enzyme. However, enzyme characterization experiments could be informed

362 by the results produced by KIPes. As KIPes has a particular focus of high impact amino acid substitutions, it  
363 would also be possible to screen sequence data sets of phenotypically interesting plants to identify blocks in  
364 pathways. Another potential application is the assessment of the functional impact of amino acid substitutions  
365 e.g. in re-sequencing studies. There are established tools like SnpEff [105] for the annotation of sequence  
366 variants in re-sequencing studies. Additionally, KIPes could operate on the set of modified peptide sequences to  
367 analyse the functional relevance of sequence variants. If functionally relevant amino acids are effected, KIPes  
368 could predict that the variant might cause non-functionality.

369  
370 Although KIPes is able to screen a genome sequence, we recommend to supply peptide or transcript  
371 sequences as input whenever possible. Well established gene prediction tools like AUGUSTUS [106] and  
372 GeMoMa [107] generate gene models of superior quality in most cases. KIPes is restricted to the identification  
373 of canonical GT-AG splice sites. The very low frequency of non-canonical splice sites in plant genomes [108]  
374 would cause extreme computational costs and could lead to a substantial numbers of mis-annotations. To the  
375 best of our knowledge, non-canonical splice sites have not been reported for genes in the flavonoid  
376 biosynthesis. Nevertheless, dedicated gene prediction tools can incorporate additional hints to predict  
377 non-canonical introns with high fidelity.

378  
379 During the identification of amino acid residues which were previously reported to be relevant for the  
380 enzyme function, we observed additional patterns. Certain positions showed not perfect conservation, but  
381 multiple amino acids with similar biochemical properties occurred at the respective position. Low relevance of  
382 the amino acid at these positions for the enzymatic activity could be one explanation. However, these patterns  
383 could also point to lineage specific specializations of various enzymes. A previous study reported the evolution  
384 of different F3'H classes in monocots [109]. Subtle differences between isoforms might cause different  
385 enzymes properties e.g. altered substrate specificities which could explain the presence of multiple isoforms of  
386 the same enzyme in some species. For example, a single amino acid has substantial influence on the enzymatic  
387 functionality of F3'H and F3'5'H [45]. This report matches our observation of both F3'5'H candidates being  
388 initially also considered as F3'H candidates. A higher overall similarity to the F3'5'H bait sequences than to the  
389 F3'H bait sequences allowed an accurate classification. This example showcases the challenges when assigning  
390 enzyme functions to peptide sequences.

391  
392 We developed KIPes for the automatic identification and annotation of core flavonoid biosynthesis  
393 enzymes, because this pathway is well characterised in numerous plant species. Quality and fidelity of the  
394 KIPes results depend on the quality of the bait sequence set and the knowledge about functionally relevant  
395 amino acid residues. Nevertheless, the implementation of KIPes allows the analysis of additional steps of the  
396 flavonoid biosynthesis (e.g. the glycosylation of flavonoids) and even the analysis of other pathways. Here, we  
397 presented the identification of enzyme candidates based on single amino acid residues with functional  
398 relevance. Functionally characterized domains were subordinate in this enzyme detection process. However,  
399 KIPes can also assess the conservation of domains. This function is not only relevant for the analysis of  
400 enzymes, but could be applied to the analysis of other proteins like transcription factors with specific binding  
401 domains.

402

## 403 **4. Materials and Methods**

### 404 4.1. Retrieval of bait and reference sequences

405 The NCBI protein database was screened for sequences of the respective enzyme for all steps in the core  
406 flavonoid biosynthesis by searching for the common names. Listed sequences were screened for associated  
407 publications about functionality of the respective sequence. Only peptide sequences with evidence for enzyme  
408 functionality were retrieved (File S7). To generate a comprehensive set of bait sequences, we also considered  
409 sequences with indirect evidence like clear differential expression associated with a phenotype and sequences  
410 which were previously included in analyses of the respective enzyme family. The set of bait and reference  
411 sequences used for the analyses described in this manuscript is designated FlavonoidBioSynBaits\_v1.0.

412

### 413 4.2. Collection of information about important amino acid residues

414 All bait sequences and one reference sequence per step in the flavonoid biosynthesis were subjected to a  
415 global alignment via MAFFT v7 [111]. Highly conserved positions, which were also reported in the literature to  
416 be functionally relevant, are referred to as ‘functionally relevant amino acid residues’ in this manuscript (File  
417 S8). The amino acid residues and their positions in a designated reference sequence are provided in one table  
418 per step in the pathway (<https://github.com/bpucker/KIPEs>). A customized Python script was applied to identify  
419 contrasting residues between two sequence sets e.g. chalcone and stilbene syntheses  
420 (<https://github.com/bpucker/KIPEs>).

421  
422 4.3. Implementation and availability of KIPEs

423 KIPEs is implemented in Python 2.7. The script is freely available via github:  
424 <https://github.com/bpucker/KIPEs>. Details about the usage are described in the manual provided along with the  
425 Python script. Collections of bait and reference sequences as well as data tables about functionally relevant  
426 amino acid residues are included. In summary, these data sets allow the automatic identification of flavonoid  
427 biosynthesis genes in other plant species via KIPEs. Customization of all data sets is possible to enable the  
428 analysis of other pathways. Mandatory dependencies of KIPEs are blastp [112], tblastn [112], and MAFFT  
429 [111]. FastTree2 [113] is an optional dependency which substantially improves the fidelity of the candidate  
430 identification and classification. Positions of candidate sequences in a phylogenetic tree are used to identify the  
431 closest bait sequences. The function of the closest bait sequence is then transferred to the candidate. However, it  
432 is possible to consider a candidate sequence for multiple different functions. If the construction of phylogenetic  
433 trees is not possible, the highest similarity to a bait sequence in a global alignment is used instead to predict a  
434 function. An analysis of functionally relevant amino acid residues in the candidate sequences is finally used to  
435 assign a function.

436  
437 4.4 Phylogenetic analysis

438 Alignments were generated with MAFFT v7 [111] and cleaned with pxclsq [114] to remove alignment  
439 columns with very low occupancy. Phylogenetic trees were constructed with FastTree v2.1.10 [113] using the  
440 WAG+CAT model. FigTree (<http://tree.bio.ed.ac.uk/software/figtree/>) was used to visualize the phylogenetic  
441 trees. Alignments were visualized online at <http://esprict.ibcp.fr/ESPrict/ESPrict/index.php> v3.0 [115] using  
442 3D structures of reference enzymes derived from the Protein Data Bank (PDB) [116] (File SH). If no PDB was  
443 available, the amino acid sequence of the respective reference enzyme was subjected to I-TASSER [117] for  
444 protein structure prediction and modelling (File S9, File S10). Conserved residues in the *C. tiglium* sequences  
445 were subsequently highlighted in the generated PDFs (File S3).

446  
447 4.5 Transcript abundance quantification

448 All available RNA-Seq data sets of *C. tiglium* [86,118] and *C. draco* [119] were retrieved from the  
449 Sequence Read Archive (<https://www.ncbi.nlm.nih.gov/sra>) via fastq-dump v2.9.6  
450 (<https://github.com/ncbi/sra-tools>). Kallisto v0.44 [120] was applied with default parameters to quantify the  
451 abundance of transcripts based on the *C. tiglium* transcriptome assembly [86].

452

## 453 5. Conclusions

454 KIPEs enables the automatic identification of enzymes involved in flavonoid biosynthesis in  
455 uninvestigated sequence data sets of plants, thus paving the way for comparative studies and the identification  
456 of lineage specific differences. While we demonstrate the applicability of KIPEs for the identification and  
457 sequence-based characterization of players in the core flavonoid biosynthesis, we envision applications beyond  
458 this pathway. Various enzymes of entire metabolic networks can be identified if sufficient knowledge about  
459 functionally relevant amino acids is available.

460

461 **Supplementary Materials:** The following are available online: File S1: KIPEs evaluation results, File S2: Phylogenetic  
462 trees of candidates, File S3: Multiple sequence alignments of candidates (acc=relative accessibility), File S4: Coding  
463 sequences of *C. tiglium* flavonoid biosynthesis genes, File S5: Peptide sequences of *C. tiglium* flavonoid biosynthesis genes,  
464 File S6: Gene expression heatmap of all candidate genes, File S7: List of bait and reference sequences, File S8:  
465 Functionally relevant amino acid residues considered of flavonoid biosynthesis enzymes, File S9: Information about used  
466 crystal structures of previously characterized enzymes and protein models produced in this study, File S10: 3D models of  
467 flavonoid biosynthesis enzyme structures generated by I-TASSER.

468

469 **Author Contributions:** B.P. and H.M.S. conceived the project. B.P., F.R., and H.M.S. conducted data analysis. B.P., F.R.,  
470 and H.M.S. wrote the manuscript. B.P. supervised the project. All authors have read and agreed to the final version of this  
471 manuscript.

472 **Funding:** This research received no external funding.

473 **Acknowledgments:** We are extremely grateful to all researchers who characterised enzymes in the flavonoid biosynthesis,  
474 submitted the underlying sequences to the appropriate databases, and published their experimental findings.

475 **Conflicts of Interest:** The authors declare no conflict of interest.

## 476 References

- 477 1. Williams, C.A.; Grayer, R.J. Anthocyanins and other flavonoids. *Nat Prod Rep* 2004, *21*, 539–573,  
478 doi:10.1039/b311404j.
- 479 2. Jaakola, L.; Hohtola, A. Effect of latitude on flavonoid biosynthesis in plants. *Plant, Cell & Environment*  
480 2010, *33*, 1239–1247, doi:10.1111/j.1365-3040.2010.02154.x.
- 481 3. Kandaswami, C.; Kanadaswami, C.; Lee, L.-T.; Lee, P.-P.H.; Hwang, J.-J.; Ke, F.-C.; Huang, Y.-T.; Lee,  
482 M.-T. The antitumor activities of flavonoids. *In Vivo* 2005, *19*, 895–909.
- 483 4. Winkel-Shirley, B. Flavonoid Biosynthesis. A Colorful Model for Genetics, Biochemistry, Cell Biology,  
484 and Biotechnology. *Plant Physiology* 2001, *126*, 485–493, doi:10.1104/pp.126.2.485.
- 485 5. Marais, J.P.J.; Deavours, B.; Dixon, R.A.; Ferreira, D. The Stereochemistry of Flavonoids. In;  
486 Grotewold, E., Ed.; Springer New York, 2006; pp. 47–69.
- 487 6. Pourcel, L.; Routaboul, J.-M.; Cheynier, V.; Lepiniec, L.; Debeaujon, I. Flavonoid oxidation in plants:  
488 from biochemical properties to physiological functions. *Trends Plant Sci.* 2007, *12*, 29–36,  
489 doi:10.1016/j.tplants.2006.11.006.
- 490 7. Murphy, A.; Peer, W.A.; Taiz, L. Regulation of auxin transport by aminopeptidases and endogenous  
491 flavonoids. *Planta* 2000, *211*, 315–324, doi:10.1007/s004250000300.
- 492 8. Mol, J.; Grotewold, E.; Koes, R. How genes paint flowers and seeds. *Trends in Plant Science* 1998, *3*,  
493 212–217, doi:10.1016/S1360-1385(98)01242-4.
- 494 9. Harborne, J.B.; Williams, C.A. Advances in flavonoid research since 1992. *Phytochemistry* 2000, *55*,  
495 481–504, doi:10.1016/s0031-9422(00)00235-1.
- 496 10. Harborne, J.B. Recent advances in chemical ecology. *Nat Prod Rep* 1999, *16*, 509–523,  
497 doi:10.1039/a804621b.
- 498 11. Appelhagen, I.; Jahns, O.; Bartelniewoehner, L.; Sagasser, M.; Weisshaar, B.; Stracke, R.  
499 Leucoanthocyanidin Dioxygenase in *Arabidopsis thaliana*: characterization of mutant alleles and  
500 regulation by MYB-BHLH-TTG1 transcription factor complexes. *Gene* 2011, *484*, 61–68,  
501 doi:10.1016/j.gene.2011.05.031.
- 502 12. Panche, A.N.; Diwan, A.D.; Chandra, S.R. Flavonoids: an overview. *J Nutr Sci* 2016, *5*,  
503 doi:10.1017/jns.2016.41.
- 504 13. Nishihara, M.; Nakatsuka, T. Genetic engineering of flavonoid pigments to modify flower color in  
505 floricultural plants. *Biotechnol Lett* 2011, *33*, 433–441, doi:10.1007/s10529-010-0461-z.
- 506 14. Kozłowska, A.; Szostak-Wegierek, D. Flavonoids--food sources and health benefits. *Rocz Panstw Zakl*  
507 *Hig* 2014, *65*, 79–85.
- 508 15. Havsteen, B.H. The biochemistry and medical significance of the flavonoids. *Pharmacol. Ther.* 2002, *96*,  
509 67–202, doi:10.1016/s0163-7258(02)00298-x.
- 510 16. Rice-Evans, C.; Miller, N.; Paganga, G. Antioxidant properties of phenolic compounds. *Trends in Plant*  
511 *Science* 1997, *2*, 152–159, doi:10.1016/S1360-1385(97)01018-2.



- 512 17. Chen, A.Y.; Chen, Y.C. A review of the dietary flavonoid, kaempferol on human health and cancer  
513 chemoprevention. *Food Chemistry* 2013, *138*, 2099–2107, doi:10.1016/j.foodchem.2012.11.139.
- 514 18. Zhang, W.; Furusaki, S. Production of anthocyanins by plant cell cultures. *Biotechnol. Bioprocess Eng.*  
515 1999, *4*, 231–252, doi:10.1007/BF02933747.
- 516 19. Appelhagen, I.; Wulff-Vester, A.K.; Wendell, M.; Hvoslef-Eide, A.-K.; Russell, J.; Oertel, A.; Martens,  
517 S.; Mock, H.-P.; Martin, C.; Matros, A. Colour bio-factories: Towards scale-up production of  
518 anthocyanins in plant cell cultures. *Metab Eng* 2018, *48*, 218–232, doi:10.1016/j.ymben.2018.06.004.
- 519 20. Forkmann, G. Flavonoids as Flower Pigments: The Formation of the Natural Spectrum and its Extension  
520 by Genetic Engineering. *Plant Breeding* 1991, *106*, 1–26, doi:10.1111/j.1439-0523.1991.tb00474.x.
- 521 21. Saito, K.; Yonekura-Sakakibara, K.; Nakabayashi, R.; Higashi, Y.; Yamazaki, M.; Tohge, T.; Fernie,  
522 A.R. The flavonoid biosynthetic pathway in Arabidopsis: structural and genetic diversity. *Plant Physiol.*  
523 *Biochem.* 2013, *72*, 21–34, doi:10.1016/j.plaphy.2013.02.001.
- 524 22. Koornneef, M. Mutations affecting the testa color in Arabidopsis. *Arabidopsis Inf. Serv.* 1990, *28*, 1–4.
- 525 23. Shirley, B.W.; Hanley, S.; Goodman, H.M. Effects of ionizing radiation on a plant genome: analysis of  
526 two Arabidopsis transparent testa mutations. *Plant Cell* 1992, *4*, 333–347, doi:10.1105/tpc.4.3.333.
- 527 24. Falcone Ferreyra, M.L.; Casas, M.I.; Questa, J.I.; Herrera, A.L.; Deblasio, S.; Wang, J.; Jackson, D.;  
528 Grotewold, E.; Casati, P. Evolution and expression of tandem duplicated maize flavonol synthase genes.  
529 *Front Plant Sci* 2012, *3*, 101, doi:10.3389/fpls.2012.00101.
- 530 25. Ferrer, J.-L.; Jez, J.M.; Bowman, M.E.; Dixon, R.A.; Noel, J.P. Structure of chalcone synthase and the  
531 molecular basis of plant polyketide biosynthesis. *Nature Structural Biology* 1999, *6*, 775–784,  
532 doi:10.1038/11553.
- 533 26. Krol, A.R. van der; Mur, L.A.; Beld, M.; Mol, J.N.; Stuitje, A.R. Flavonoid genes in petunia: addition of  
534 a limited number of gene copies may lead to a suppression of gene expression. *The Plant Cell* 1990, *2*,  
535 291–299, doi:10.1105/tpc.2.4.291.
- 536 27. Schröder, G.; Schröder, J. A single change of histidine to glutamine alters the substrate preference of a  
537 stilbene synthase. *J. Biol. Chem.* 1992, *267*, 20558–20560.
- 538 28. Jez, J.M.; Bowman, M.E.; Dixon, R.A.; Noel, J.P. Structure and mechanism of the evolutionarily unique  
539 plant enzyme chalcone isomerase. *Nature Structural Biology* 2000, *7*, 786–791, doi:10.1038/79025.
- 540 29. Jez, J.M.; Noel, J.P. Reaction mechanism of chalcone isomerase. pH dependence, diffusion control, and  
541 product binding differences. *J. Biol. Chem.* 2002, *277*, 1361–1369, doi:10.1074/jbc.M109224200.
- 542 30. Cheng, A.-X.; Zhang, X.; Han, X.-J.; Zhang, Y.-Y.; Gao, S.; Liu, C.-J.; Lou, H.-X. Identification of  
543 chalcone isomerase in the basal land plants reveals an ancient evolution of enzymatic cyclization activity  
544 for synthesis of flavonoids. *New Phytologist* 2018, *217*, 909–924, doi:10.1111/nph.14852.
- 545 31. Kaltenbach, M.; Burke, J.R.; Dindo, M.; Pabis, A.; Munsberg, F.S.; Rabin, A.; Kamerlin, S.C.L.; Noel,  
546 J.P.; Tawfik, D.S. Evolution of chalcone isomerase from a noncatalytic ancestor. *Nature Chemical*  
547 *Biology* 2018, *14*, 548–555, doi:10.1038/s41589-018-0042-3.
- 548 32. Forkmann, G.; Heller, W.; Grisebach, H. Anthocyanin Biosynthesis in Flowers of *Matthiola incana*  
549 Flavanone 3-and Flavonoid 3'-Hydroxylases. *Zeitschrift für Naturforschung C* 1980, *35*, 691–695,  
550 doi:10.1515/znc-1980-9-1004.
- 551 33. Prescott, A.G.; John, P. DIOXYGENASES: Molecular Structure and Role in Plant Metabolism. *Annu.*  
552 *Rev. Plant Physiol. Plant Mol. Biol.* 1996, *47*, 245–271, doi:10.1146/annurev.arplant.47.1.245.
- 553 34. Cheng, A.-X.; Han, X.-J.; Wu, Y.-F.; Lou, H.-X. The Function and Catalysis of  
554 2-Oxoglutarate-Dependent Oxygenases Involved in Plant Flavonoid Biosynthesis. *Int J Mol Sci* 2014, *15*,  
555 1080–1095, doi:10.3390/ijms15011080.

- 556 35. Owens, D.K.; Alerding, A.B.; Crosby, K.C.; Bandara, A.B.; Westwood, J.H.; Winkel, B.S.J. Functional  
557 analysis of a predicted flavonol synthase gene family in Arabidopsis. *Plant Physiol.* 2008, *147*,  
558 1046–1061, doi:10.1104/pp.108.117457.
- 559 36. Park, S.; Kim, D.-H.; Park, B.-R.; Lee, J.-Y.; Lim, S.-H. Molecular and Functional Characterization of  
560 *Oryza sativa* Flavonol Synthase (OsFLS), a Bifunctional Dioxygenase. *J. Agric. Food Chem.* 2019, *67*,  
561 7399–7409, doi:10.1021/acs.jafc.9b02142.
- 562 37. Xu, F.; Li, L.; Zhang, W.; Cheng, H.; Sun, N.; Cheng, S.; Wang, Y. Isolation, characterization, and  
563 function analysis of a flavonol synthase gene from *Ginkgo biloba*. *Mol. Biol. Rep.* 2012, *39*, 2285–2296,  
564 doi:10.1007/s11033-011-0978-9.
- 565 38. Turnbull, J.J.; Nagle, M.J.; Seibel, J.F.; Welford, R.W.D.; Grant, G.H.; Schofield, C.J. The C-4  
566 stereochemistry of leucocyanidin substrates for anthocyanidin synthase affects product selectivity.  
567 *Bioorganic & Medicinal Chemistry Letters* 2003, *13*, 3853–3857,  
568 doi:10.1016/S0960-894X(03)00711-X.
- 569 39. Welford, R.W.D.; Turnbull, J.J.; Claridge, T.D.W.; Prescott, A.G.; Schofield, C.J. Evidence for oxidation  
570 at C-3 of the flavonoid C-ring during anthocyanin biosynthesis. *Chem. Commun.* 2001, 1828–1829,  
571 doi:10.1039/B105576N.
- 572 40. Yan, Y.; Chemler, J.; Huang, L.; Martens, S.; Koffas, M.A.G. Metabolic Engineering of Anthocyanin  
573 Biosynthesis in *Escherichia coli*. *Appl Environ Microbiol* 2005, *71*, 3617–3623,  
574 doi:10.1128/AEM.71.7.3617-3623.2005.
- 575 41. Almeida, J.R.M.; D’Amico, E.; Preuss, A.; Carbone, F.; de Vos, C.H.R.; Deiml, B.; Mourgues, F.;  
576 Perrotta, G.; Fischer, T.C.; Bovy, A.G.; et al. Characterization of major enzymes and genes involved in  
577 flavonoid and proanthocyanidin biosynthesis during fruit development in strawberry (*Fragaria*  
578 *xananassa*). *Arch. Biochem. Biophys.* 2007, *465*, 61–71, doi:10.1016/j.abb.2007.04.040.
- 579 42. Brugliera, F.; Barri-Rewell, G.; Holton, T.A.; Mason, J.G. Isolation and characterization of a flavonoid  
580 3'-hydroxylase cDNA clone corresponding to the Ht1 locus of *Petunia hybrida*. *Plant J.* 1999, *19*,  
581 441–451.
- 582 43. Vetten, N. de; Horst, J. ter; Schaik, H.-P. van; Boer, A. de; Mol, J.; Koes, R. A cytochrome b5 is required  
583 for full activity of flavonoid 3',5'-hydroxylase, a cytochrome P450 involved in the formation of blue  
584 flower colors. *PNAS* 1999, *96*, 778–783, doi:10.1073/pnas.96.2.778.
- 585 44. Olsen, K.M.; Hehn, A.; Jugdé, H.; Slimestad, R.; Larbat, R.; Bourgaud, F.; Lillo, C. Identification and  
586 characterisation of CYP75A31, a new flavonoid 3',5'-hydroxylase, isolated from *Solanum lycopersicum*.  
587 *BMC Plant Biology* 2010, *10*, 21, doi:10.1186/1471-2229-10-21.
- 588 45. Seitz, C.; Ameres, S.; Forkmann, G. Identification of the molecular basis for the functional difference  
589 between flavonoid 3'-hydroxylase and flavonoid 3',5'-hydroxylase. *FEBS Lett.* 2007, *581*, 3429–3434,  
590 doi:10.1016/j.febslet.2007.06.045.
- 591 46. Holton, T.A.; Brugliera, F.; Tanaka, Y. Cloning and expression of flavonol synthase from *Petunia*  
592 *hybrida*. *Plant J.* 1993, *4*, 1003–1010, doi:10.1046/j.1365-313x.1993.04061003.x.
- 593 47. Forkmann, G.; Vlaming, P. de; Spribille, R.; Wiering, H.; Schram, A.W. Genetic and Biochemical  
594 Studies on the Conversion of Dihydroflavonols to Flavonols in Flowers of *Petunia hybrida*. *Zeitschrift für*  
595 *Naturforschung C* 1985, *41*, 179–186, doi:10.1515/znc-1986-1-227.
- 596 48. Britsch, L.; Heller, W.; Grisebach, H. Conversion of Flavanone to Flavone, Dihydroflavonol and  
597 Flavonol with an Enzyme System from Cell Cultures of Parsley. *Zeitschrift für Naturforschung C* 1981,  
598 *36*, 742–750, doi:10.1515/znc-1981-9-1009.

- 599 49. Pelletier, M.K.; Murrell, J.R.; Shirley, B.W. Characterization of Flavonol Synthase and  
600 Leucoanthocyanidin Dioxygenase Genes in Arabidopsis (Further Evidence for Differential Regulation of  
601 “Early” and “Late” Genes). *Plant Physiology* 1997, *113*, 1437–1445, doi:10.1104/pp.113.4.1437.
- 602 50. Hostetler, G.L.; Ralston, R.A.; Schwartz, S.J. Flavones: Food Sources, Bioavailability, Metabolism, and  
603 Bioactivity. *Adv Nutr* 2017, *8*, 423–435, doi:10.3945/an.116.012948.
- 604 51. Martens, S.; Forkmann, G.; Britsch, L.; Wellmann, F.; Matern, U.; Lukacin, R. Divergent evolution of  
605 flavonoid 2-oxoglutarate-dependent dioxygenases in parsley. *FEBS Lett.* 2003, *544*, 93–98,  
606 doi:10.1016/s0014-5793(03)00479-4.
- 607 52. Martens, S.; Forkmann, G. Cloning and expression of flavone synthase II from Gerbera hybrids. *Plant J.*  
608 1999, *20*, 611–618, doi:10.1046/j.1365-313x.1999.00636.x.
- 609 53. Gebhardt, Y.H.; Witte, S.; Steuber, H.; Matern, U.; Martens, S. Evolution of Flavone Synthase I from  
610 Parsley Flavanone  $\beta$ -Hydroxylase by Site-Directed Mutagenesis. *Plant Physiol* 2007, *144*, 1442–1454,  
611 doi:10.1104/pp.107.098392.
- 612 54. Davies, K.M.; Schwinn, K.E.; Deroles, S.C.; Manson, D.G.; Lewis, D.H.; Bloor, S.J.; Bradley, J.M.  
613 Enhancing anthocyanin production by altering competition for substrate between flavonol synthase and  
614 dihydroflavonol 4-reductase. *Euphytica* 2003, *131*, 259–268, doi:10.1023/A:1024018729349.
- 615 55. Johnson, E.T.; Ryu, S.; Yi, H.; Shin, B.; Cheong, H.; Choi, G. Alteration of a single amino acid changes  
616 the substrate specificity of dihydroflavonol 4-reductase. *Plant J.* 2001, *25*, 325–333,  
617 doi:10.1046/j.1365-313x.2001.00962.x.
- 618 56. Miosic, S.; Thill, J.; Milosevic, M.; Gosch, C.; Pober, S.; Molitor, C.; Ejaz, S.; Rompel, A.; Stich, K.;  
619 Halbwirth, H. Dihydroflavonol 4-Reductase Genes Encode Enzymes with Contrasting Substrate  
620 Specificity and Show Divergent Gene Expression Profiles in Fragaria Species. *PLOS ONE* 2014, *9*,  
621 e112707, doi:10.1371/journal.pone.0112707.
- 622 57. Katsu, K.; Suzuki, R.; Tsuchiya, W.; Inagaki, N.; Yamazaki, T.; Hisano, T.; Yasui, Y.; Komori, T.;  
623 Koshio, M.; Kubota, S.; et al. A new buckwheat dihydroflavonol 4-reductase (DFR), with a unique  
624 substrate binding structure, has altered substrate specificity. *BMC Plant Biol* 2017, *17*,  
625 doi:10.1186/s12870-017-1200-6.
- 626 58. Gang, D.R.; Kasahara, H.; Xia, Z.Q.; Vander Mijnsbrugge, K.; Bauw, G.; Boerjan, W.; Van Montagu,  
627 M.; Davin, L.B.; Lewis, N.G. Evolution of plant defense mechanisms. Relationships of phenylcoumaran  
628 benzylic ether reductases to pinoresinol-lariciresinol and isoflavone reductases. *J. Biol. Chem.* 1999, *274*,  
629 7516–7527, doi:10.1074/jbc.274.11.7516.
- 630 59. Gao, J.; Shen, L.; Yuan, J.; Zheng, H.; Su, Q.; Yang, W.; Zhang, L.; Nnaemeka, V.E.; Sun, J.; Ke, L.; et  
631 al. Functional analysis of GhCHS, GhANR and GhLAR in colored fiber formation of Gossypium  
632 hirsutum L. *BMC Plant Biol* 2019, *19*, 455, doi:10.1186/s12870-019-2065-7.
- 633 60. Timberlake, C.F.; Bridle, P. Spectral Studies of Anthocyanin and Anthocyanidin Equilibria in Aqueous  
634 Solution. *Nature* 1966, *212*, 158–159, doi:10.1038/212158a0.
- 635 61. Kovinich, N.; Saleem, A.; Rintoul, T.L.; Brown, D.C.W.; Arnason, J.T.; Miki, B. Coloring genetically  
636 modified soybean grains with anthocyanins by suppression of the proanthocyanidin genes ANR1 and  
637 ANR2. *Transgenic Res.* 2012, *21*, 757–771, doi:10.1007/s11248-011-9566-y.
- 638 62. Xie, D.-Y.; Sharma, S.B.; Dixon, R.A. Anthocyanidin reductases from *Medicago truncatula* and  
639 *Arabidopsis thaliana*. *Arch. Biochem. Biophys.* 2004, *422*, 91–102, doi:10.1016/j.abb.2003.12.011.
- 640 63. Weisshaar, B.; Jenkins, G.I. Phenylpropanoid biosynthesis and its regulation. *Curr. Opin. Plant Biol.*  
641 1998, *1*, 251–257, doi:10.1016/s1369-5266(98)80113-1.

- 642 64. Stracke, R.; Werber, M.; Weisshaar, B. The R2R3-MYB gene family in *Arabidopsis thaliana*. *Current*  
643 *Opinion in Plant Biology* 2001, 4, 447–456, doi:10.1016/S1369-5266(00)00199-0.
- 644 65. Du, H.; Liang, Z.; Zhao, S.; Nan, M.-G.; Tran, L.-S.P.; Lu, K.; Huang, Y.-B.; Li, J.-N. The Evolutionary  
645 History of R2R3-MYB Proteins Across 50 Eukaryotes: New Insights Into Subfamily Classification and  
646 Expansion. *Sci Rep* 2015, 5, 1–16, doi:10.1038/srep11037.
- 647 66. Hichri, I.; Barrieu, F.; Bogs, J.; Kappel, C.; Delrot, S.; Lauvergeat, V. Recent advances in the  
648 transcriptional regulation of the flavonoid biosynthetic pathway. *J. Exp. Bot.* 2011, 62, 2465–2483,  
649 doi:10.1093/jxb/erq442.
- 650 67. Ramsay, N.A.; Glover, B.J. MYB-bHLH-WD40 protein complex and the evolution of cellular diversity.  
651 *Trends Plant Sci.* 2005, 10, 63–70, doi:10.1016/j.tplants.2004.12.011.
- 652 68. Carretero-Paulet, L.; Galstyan, A.; Roig-Villanova, I.; Martínez-García, J.F.; Bilbao-Castro, J.R.;  
653 Robertson, D.L. Genome-wide classification and evolutionary analysis of the bHLH family of  
654 transcription factors in *Arabidopsis*, poplar, rice, moss, and algae. *Plant Physiol.* 2010, 153, 1398–1412,  
655 doi:10.1104/pp.110.153593.
- 656 69. Stracke, R.; Ishihara, H.; Huep, G.; Barsch, A.; Mehrtens, F.; Niehaus, K.; Weisshaar, B. Differential  
657 regulation of closely related R2R3-MYB transcription factors controls flavonol accumulation in different  
658 parts of the *Arabidopsis thaliana* seedling. *Plant J.* 2007, 50, 660–677,  
659 doi:10.1111/j.1365-313X.2007.03078.x.
- 660 70. Pillet, J.; Yu, H.-W.; Chambers, A.H.; Whitaker, V.M.; Folta, K.M. Identification of candidate flavonoid  
661 pathway genes using transcriptome correlation network analysis in ripe strawberry (*Fragaria × ananassa*)  
662 fruits. *J Exp Bot* 2015, 66, 4455–4467, doi:10.1093/jxb/erv205.
- 663 71. Pandey, A.; Alok, A.; Lakhwani, D.; Singh, J.; Asif, M.H.; Trivedi, P.K. Genome-wide Expression  
664 Analysis and Metabolite Profiling Elucidate Transcriptional Regulation of Flavonoid Biosynthesis and  
665 Modulation under Abiotic Stresses in Banana. *Sci Rep* 2016, 6, 1–13, doi:10.1038/srep31361.
- 666 72. Otani, M.; Kanemaki, Y.; Oba, F.; Shibuya, M.; Funayama, Y.; Nakano, M. Comprehensive isolation and  
667 expression analysis of the flavonoid biosynthesis-related genes in *Tricyrtis* spp. *Biol Plant* 2018, 62,  
668 684–692, doi:10.1007/s10535-018-0802-7.
- 669 73. Qu, C.; Zhao, H.; Fu, F.; Wang, Z.; Zhang, K.; Zhou, Y.; Wang, X.; Wang, R.; Xu, X.; Tang, Z.; et al.  
670 Genome-Wide Survey of Flavonoid Biosynthesis Genes and Gene Expression Analysis between Black-  
671 and Yellow-Seeded *Brassica napus*. *Front. Plant Sci.* 2016, 7, doi:10.3389/fpls.2016.01755.
- 672 74. Wang, J.; Zhang, Q.; Cui, F.; Hou, L.; Zhao, S.; Xia, H.; Qiu, J.; Li, T.; Zhang, Y.; Wang, X.; et al.  
673 Genome-Wide Analysis of Gene Expression Provides New Insights into Cold Responses in *Thellungiella*  
674 *salsuginea*. *Front Plant Sci* 2017, 8, doi:10.3389/fpls.2017.00713.
- 675 75. Amirbakhtiar, N.; Ismaili, A.; Ghaffari, M.R.; Firouzabadi, F.N.; Shobbar, Z.-S. Transcriptome response  
676 of roots to salt stress in a salinity-tolerant bread wheat cultivar. *PLOS ONE* 2019, 14, e0213305,  
677 doi:10.1371/journal.pone.0213305.
- 678 76. Sicilia, A.; Testa, G.; Santoro, D.F.; Cosentino, S.L.; Lo Piero, A.R. RNASeq analysis of giant cane  
679 reveals the leaf transcriptome dynamics under long-term salt stress. *BMC Plant Biol* 2019, 19, 355,  
680 doi:10.1186/s12870-019-1964-y.
- 681 77. Pucker, B.; Schilbert, H.M. Genomics and Transcriptomics Advance in Plant Sciences. In *Molecular*  
682 *Approaches in Plant Biology and Environmental Challenges*; Singh, S.P., Upadhyay, S.K., Pandey, A.,  
683 Kumar, S., Eds.; Energy, Environment, and Sustainability; Springer: Singapore, 2019; pp. 419–448 ISBN  
684 9789811506901.

- 685 78. Kalwij, J.M. Review of ‘The Plant List, a working list of all plant species.’ *Journal of Vegetation Science*  
686 2012, 23, 998–1002, doi:10.1111/j.1654-1103.2012.01407.x.
- 687 79. Pope, J. On a New Preparation of Croton Tiglium. *Med Chir Trans* 1827, 13, 97–102,  
688 doi:10.1177/09595287270130p111.
- 689 80. Gläser, S.; Sorg, B.; Hecker, E. A Method for Quantitative Determination of Polyfunctional Diterpene  
690 Esters of the Tigliane Type in Croton tiglium. *Planta Med.* 1988, 54, 580, doi:10.1055/s-2006-962595.
- 691 81. Kim, J.H.; Lee, S.J.; Han, Y.B.; Moon, J.J.; Kim, J.B. Isolation of isoguanosine from Croton tiglium and  
692 its antitumor activity. *Arch. Pharm. Res.* 1994, 17, 115–118, doi:10.1007/bf02974234.
- 693 82. El-Mekawy, S.; Meselhy, M.R.; Nakamura, N.; Hattori, M.; Kawahata, T.; Otake, T. Anti-HIV-1  
694 phorbol esters from the seeds of Croton tiglium. *Phytochemistry* 2000, 53, 457–464,  
695 doi:10.1016/s0031-9422(99)00556-7.
- 696 83. Abbas, M.; Shahid, M.; Sheikh, M.A.; Muhammad, G. Phytochemical Screening of Plants Used in  
697 Folkloric Medicine: Effect of Extraction Method and Solvent. *Asian Journal of Chemistry* 2014, 26,  
698 6194–6198, doi:10.14233/ajchem.2014.17125.
- 699 84. Palmeira Jr., S.F.; Conserva, L.M.; Silveira, E.R. Two clerodane diterpenes and flavonoids from Croton  
700 brasiliensis. *Journal of the Brazilian Chemical Society* 2005, 16, 1420–1424,  
701 doi:10.1590/S0103-50532005000800021.
- 702 85. Kostova, I.; Iossifova, T.; Rostan, J.; Vogler, B.; Kraus, W.; Navas, H. Chemical and biological studies  
703 on Croton panamensis latex (Dragon’s Blood). *Pharmaceutical and Pharmacological Letters* 1999, 9,  
704 34–36.
- 705 86. Haak, M.; Vinke, S.; Keller, W.; Droste, J.; Rückert, C.; Kalinowski, J.; Pucker, B. High Quality de Novo  
706 Transcriptome Assembly of Croton tiglium. *Front. Mol. Biosci.* 2018, 5, doi:10.3389/fmolb.2018.00062.
- 707 87. Li, C.; Wu, X.; Sun, R.; Zhao, P.; Liu, F.; Zhang, C. Croton Tiglium Extract Induces Apoptosis via  
708 Bax/Bcl-2 Pathways in Human Lung Cancer A549 Cells. *Asian Pac J Cancer Prev* 2016, 17, 4893–4898,  
709 doi:10.22034/APJCP.2016.17.11.4893.
- 710 88. Salatino, A.; Salatino, M.L.F.; Negri, G. Traditional uses, chemistry and pharmacology of Croton species  
711 (Euphorbiaceae). *Journal of the Brazilian Chemical Society* 2007, 18, 11–33,  
712 doi:10.1590/S0103-50532007000100002.
- 713 89. Tsacheva, I.; Rostan, J.; Iossifova, T.; Vogler, B.; Odjakova, M.; Navas, H.; Kostova, I.; Kojouharova,  
714 M.; Kraus, W. Complement inhibiting properties of dragon’s blood from Croton draco. *Z. Naturforsch.,*  
715 *C, J. Biosci.* 2004, 59, 528–532, doi:10.1515/znc-2004-7-814.
- 716 90. Maciel, M.A.; Pinto, A.C.; Arruda, A.C.; Pamplona, S.G.; Vanderlinde, F.A.; Lapa, A.J.; Echevarria, A.;  
717 Grynberg, N.F.; Côlus, I.M.; Farias, R.A.; et al. Ethnopharmacology, phytochemistry and pharmacology:  
718 a successful combination in the study of Croton cajucara. *J Ethnopharmacol* 2000, 70, 41–55,  
719 doi:10.1016/s0378-8741(99)00159-2.
- 720 91. Guerrero, M.F.; Puebla, P.; Carrón, R.; Martín, M.L.; Román, L.S. Quercetin 3,7-dimethyl ether: a  
721 vasorelaxant flavonoid isolated from Croton schiedeanus Schlecht. *Journal of Pharmacy and*  
722 *Pharmacology* 2002, 54, 1373–1378, doi:10.1211/002235702760345455.
- 723 92. Krebs, H.C.; Ramiarantsoa, H. Clerodane diterpenes of Croton hovarum. *Phytochemistry* 1997, 45,  
724 379–381, doi:10.1016/S0031-9422(96)00815-1.
- 725 93. Shimada, S.; Otsuki, H.; Sakuta, M. Transcriptional control of anthocyanin biosynthetic genes in the  
726 Caryophyllales. *J Exp Bot* 2007, 58, 957–967, doi:10.1093/jxb/erl256.



- 727 94. Nesi, N.; Debeaujon, I.; Jond, C.; Pelletier, G.; Caboche, M.; Lepiniec, L. The TT8 Gene Encodes a Basic  
728 Helix-Loop-Helix Domain Protein Required for Expression of DFR and BAN Genes in Arabidopsis  
729 Siliques. *The Plant Cell* 2000, *12*, 1863–1878, doi:10.1105/tpc.12.10.1863.
- 730 95. Ni, R.; Zhu, T.-T.; Zhang, X.-S.; Wang, P.-Y.; Sun, C.-J.; Qiao, Y.-N.; Lou, H.-X.; Cheng, A.-X.  
731 Identification and evolutionary analysis of chalcone isomerase-fold proteins in ferns. *J Exp Bot* 2020, *71*,  
732 290–304, doi:10.1093/jxb/erz425.
- 733 96. Cai, Y.; Evans, F.J.; Roberts, M.F.; Phillipson, J.D.; Zenk, M.H.; Gleba, Y.Y. Polyphenolic compounds  
734 from *Croton lechleri*. *Phytochemistry* 1991, *30*, 2033–2040, doi:10.1016/0031-9422(91)85063-6.
- 735 97. Furlan, C.M.; Santos, K.P.; Sedano-Partida, M.D.; Motta, L.B. da; Santos, D.Y.A.C.; Salatino, M.L.F.;  
736 Negri, G.; Berry, P.E.; van Ee, B.W.; Salatino, A. Flavonoids and antioxidant potential of nine  
737 Argentinian species of *Croton* (Euphorbiaceae). *Braz. J. Bot* 2015, *38*, 693–702,  
738 doi:10.1007/s40415-014-0115-9.
- 739 98. de Sampaio e Spohr, T.C.L.; Stipursky, J.; Sasaki, A.C.; Barbosa, P.R.; Martins, V.; Benjamim, C.F.;  
740 Roque, N.F.; Costa, S.L.; Gomes, F.C.A. Effects of the flavonoid casticin from Brazilian *Croton*  
741 *betulaster* in cerebral cortical progenitors in vitro: direct and indirect action through astrocytes. *J.*  
742 *Neurosci. Res.* 2010, *88*, 530–541, doi:10.1002/jnr.22218.
- 743 99. Biscaro, F.; Parisotto, E.B.; Zanette, V.C.; Günther, T.M.F.; Ferreira, E.A.; Gris, E.F.; Correia, J.F.G.;  
744 Pich, C.T.; Mattivi, F.; Filho, D.W.; et al. Anticancer activity of flavonol and flavan-3-ol rich extracts  
745 from *Croton celtidifolius* latex. *Pharmaceutical Biology* 2013, *51*, 737–743,  
746 doi:10.3109/13880209.2013.764331.
- 747 100. Aderogba, M.A.; Ndhala, A.R.; Rengasamy, K.R.R.; Van Staden, J. Antimicrobial and selected in vitro  
748 enzyme inhibitory effects of leaf extracts, flavonols and indole alkaloids isolated from *Croton*  
749 *menyharthii*. *Molecules* 2013, *18*, 12633–12644, doi:10.3390/molecules181012633.
- 750 101. Cruz, B.G.; Dos Santos, H.S.; Bandeira, P.N.; Rodrigues, T.H.S.; Matos, M.G.C.; Nascimento, M.F.; de  
751 Carvalho, G.G.C.; Braz-Filho, R.; Teixeira, A.M.R.; Tintino, S.R.; et al. Evaluation of antibacterial and  
752 enhancement of antibiotic action by the flavonoid kaempferol  
753 7-O- $\beta$ -D-(6''-O-cumaroyl)-glucopyranoside isolated from *Croton piuhensis* müll. *Microb. Pathog.*  
754 2020, *143*, 104144, doi:10.1016/j.micpath.2020.104144.
- 755 102. Nascimento, A.M.; Maria-Ferreira, D.; Dal Lin, F.T.; Kimura, A.; de Santana-Filho, A.P.; Werner, M.F.  
756 de P.; Iacomini, M.; Sasaki, G.L.; Cipriani, T.R.; de Souza, L.M. Phytochemical analysis and  
757 anti-inflammatory evaluation of compounds from an aqueous extract of *Croton cajucara* Benth. *J Pharm*  
758 *Biomed Anal* 2017, *145*, 821–830, doi:10.1016/j.jpba.2017.07.032.
- 759 103. Prescott, A.G.; Stamford, N.P.J.; Wheeler, G.; Firmin, J.L. In vitro properties of a recombinant flavonol  
760 synthase from *Arabidopsis thaliana*. *Phytochemistry* 2002, *60*, 589–593,  
761 doi:10.1016/s0031-9422(02)00155-3.
- 762 104. Lukacin, R.; Wellmann, F.; Britsch, L.; Martens, S.; Matern, U. Flavonol synthase from *Citrus unshiu* is a  
763 bifunctional dioxygenase. *Phytochemistry* 2003, *62*, 287–292, doi:10.1016/s0031-9422(02)00567-8.
- 764 105. Cingolani, P.; Platts, A.; Wang, L.L.; Coon, M.; Nguyen, T.; Wang, L.; Land, S.J.; Lu, X.; Ruden, D.M.  
765 A program for annotating and predicting the effects of single nucleotide polymorphisms, SnpEff: SNPs in  
766 the genome of *Drosophila melanogaster* strain w1118; iso-2; iso-3. *Fly (Austin)* 2012, *6*, 80–92,  
767 doi:10.4161/fly.19695.
- 768 106. Stanke, M.; Steinkamp, R.; Waack, S.; Morgenstern, B. AUGUSTUS: a web server for gene finding in  
769 eukaryotes. *Nucleic Acids Res* 2004, *32*, W309–W312, doi:10.1093/nar/gkh379.

- 770 107. Keilwagen, J.; Hartung, F.; Paulini, M.; Twardziok, S.O.; Grau, J. Combining RNA-seq data and  
771 homology-based gene prediction for plants, animals and fungi. *BMC Bioinformatics* 2018, *19*, 189,  
772 doi:10.1186/s12859-018-2203-5.
- 773 108. Pucker, B.; Brockington, S.F. Genome-wide analyses supported by RNA-Seq reveal non-canonical splice  
774 sites in plant genomes. *BMC Genomics* 2018, *19*, 980, doi:10.1186/s12864-018-5360-z.
- 775 109. Jia, Y.; Li, B.; Zhang, Y.; Zhang, X.; Xu, Y.; Li, C. Evolutionary dynamic analyses on monocot flavonoid  
776 3'-hydroxylase gene family reveal evidence of plant-environment interaction. *BMC Plant Biology* 2019,  
777 *19*, 347, doi:10.1186/s12870-019-1947-z.
- 778 110. Nielsen, K.; Deroles, S.C.; Markham, K.R.; Bradley, M.J.; Podivinsky, E.; Manson, D. Antisense  
779 flavonol synthase alters copigmentation and flower color in lisianthus. *Molecular Breeding* 2002, *9*,  
780 217–229, doi:10.1023/A:1020320809654.
- 781 111. Katoh, K.; Standley, D.M. MAFFT Multiple Sequence Alignment Software Version 7: Improvements in  
782 Performance and Usability. *Molecular Biology and Evolution* 2013, *30*, 772–780,  
783 doi:10.1093/molbev/mst010.
- 784 112. Altschul, S.F.; Gish, W.; Miller, W.; Myers, E.W.; Lipman, D.J. Basic local alignment search tool.  
785 *Journal of Molecular Biology* 1990, *215*, 403–410, doi:10.1016/S0022-2836(05)80360-2.
- 786 113. Price, M.N.; Dehal, P.S.; Arkin, A.P. FastTree 2 – Approximately Maximum-Likelihood Trees for Large  
787 Alignments. *PLOS ONE* 2010, *5*, e9490, doi:10.1371/journal.pone.0009490.
- 788 114. Brown, J.W.; Walker, J.F.; Smith, S.A. Phyx: phylogenetic tools for unix. *Bioinformatics* 2017, *33*,  
789 1886–1888, doi:10.1093/bioinformatics/btx063.
- 790 115. Robert, X.; Gouet, P. Deciphering key features in protein structures with the new ENDscript server.  
791 *Nucleic Acids Res* 2014, *42*, W320–W324, doi:10.1093/nar/gku316.
- 792 116. Berman, H.M.; Westbrook, J.; Feng, Z.; Gilliland, G.; Bhat, T.N.; Weissig, H.; Shindyalov, I.N.; Bourne,  
793 P.E. The Protein Data Bank. *Nucleic Acids Res* 2000, *28*, 235–242, doi:10.1093/nar/28.1.235.
- 794 117. Roy, A.; Kucukural, A.; Zhang, Y. I-TASSER: a unified platform for automated protein structure and  
795 function prediction. *Nat Protoc* 2010, *5*, 725–738, doi:10.1038/nprot.2010.5.
- 796 118. Leebens-Mack, J.H.; Barker, M.S.; Carpenter, E.J.; Deyholos, M.K.; Gitzendanner, M.A.; Graham, S.W.;  
797 Grosse, I.; Li, Z.; Melkonian, M.; Mirarab, S.; et al. One thousand plant transcriptomes and the  
798 phylogenomics of green plants. *Nature* 2019, *574*, 679–685, doi:10.1038/s41586-019-1693-2.
- 799 119. Canedo-Téxon, A.; Ramón-Farías, F.; Monribot-Villanueva, J.L.; Villafán, E.; Alonso-Sánchez, A.;  
800 Pérez-Torres, C.A.; Ángeles, G.; Guerrero-Analco, J.A.; Ibarra-Laclette, E. Novel findings to the  
801 biosynthetic pathway of magnoflorine and taspine through transcriptomic and metabolomic analysis of  
802 *Croton draco* (Euphorbiaceae). *BMC Plant Biology* 2019, *19*, 560, doi:10.1186/s12870-019-2195-y.
- 803 120. Bray, N.L.; Pimentel, H.; Melsted, P.; Pachter, L. Near-optimal probabilistic RNA-seq quantification.  
804 *Nature Biotechnology* 2016, *34*, 525–527, doi:10.1038/nbt.3519.
- 805

806
